# Supplementary material
Source: PubMed Central journal article supplement (PMC1297683)
Supplement: pnas_0508649102_1.pdf [file pnas_0508649102_1.pdf]

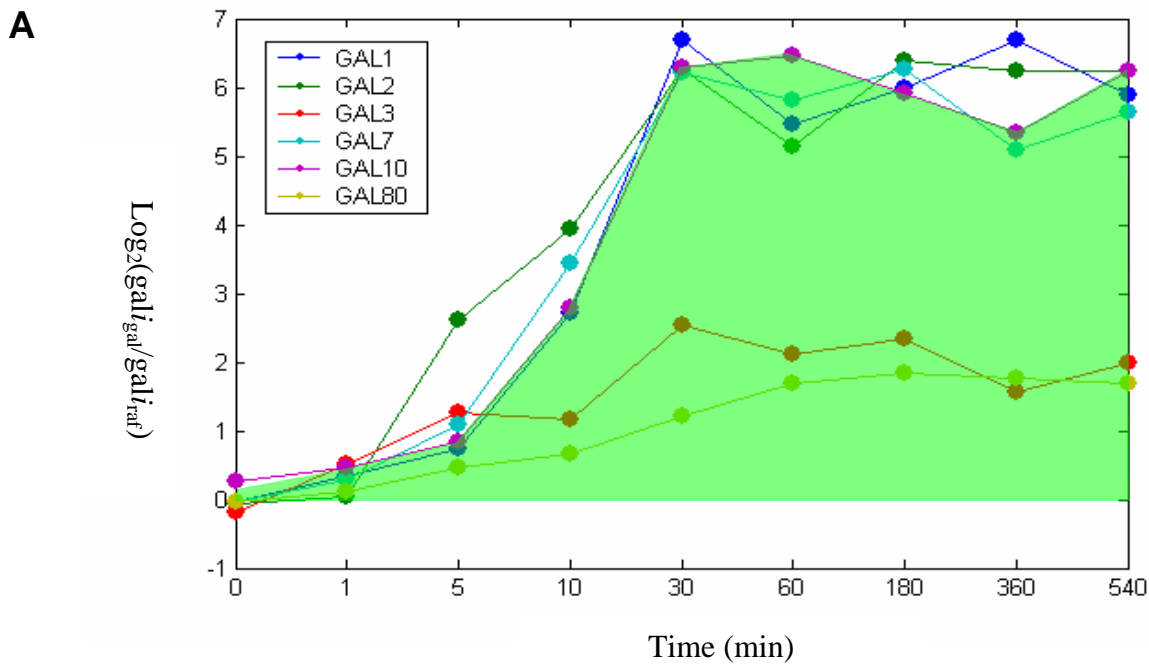

**B**

**Evidence**

**Measure**

**Distribution of each measure estimated by kernel density estimator**

Time-Course  
Gene Exp.

$$\int_0^{9\text{hr}} \log_{10}(\text{gal}_i/\text{raf}_i)_t dt$$

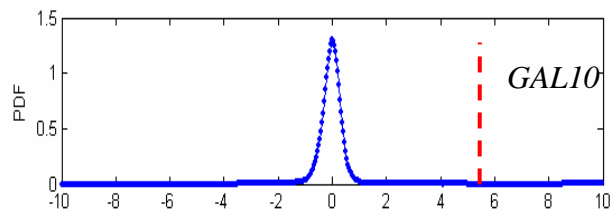

Knock-out  
Gene Exp.

$$\text{Max } |\log_{10}(\Delta\text{gal}_k/\text{wt})|$$

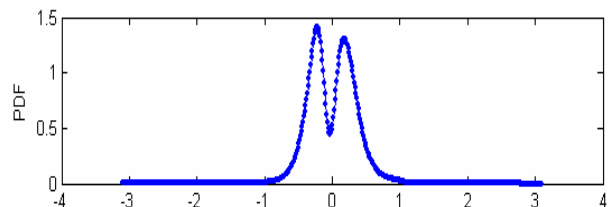

Protein  
Expression

$$\log_{10}(\text{gal}_i/\text{raf}_i)$$

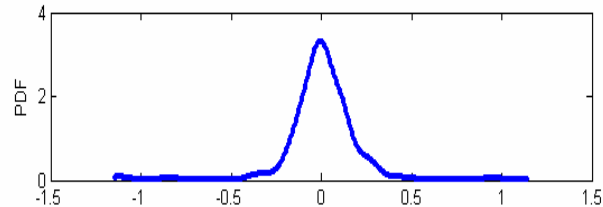

Measure
