# Supplementary material
Source: PubMed Central journal article supplement (PMC1297683)
Supplement: pnas_0508649102_3.pdf [file pnas_0508649102_3.pdf]

$$\rho_{\text{exp}}(d_{AB}^2) = \alpha_{\text{EPR}} \cdot \rho_i(d_{AB}^2) + (1 - \alpha_{\text{EPR}}) \cdot \rho_n(d_{AB}^2)$$

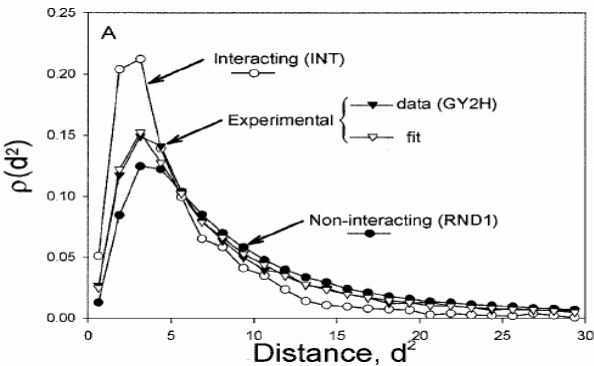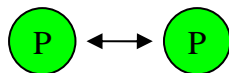

**Small-scale Exp.**  
( $P=0.05$ )

**Multiple HT Exp.:**  
**Y2H, TAP-HCI**  
( $P=1-0.87=0.13$ )

**Single Y2H**  
( $P=1-0.4=0.6$ )

**PVM**  
( $P=1-0.78=0.22$ )

| Dataset   | $\alpha_{\text{EPR}}$ | $\chi^2$ | $N$ |
|-----------|-----------------------|----------|-----|
| DIP-YEAST | $0.48 \pm 0.03$       | 9.07     | 29  |
| EC2       | $0.85 \pm 0.06$       | 1.65     | 16  |
| EC3       | $0.88 \pm 0.17$       | 3.05     | 10  |
| GY2H      | $0.31 \pm 0.04$       | 14.84    | 29  |
| GY2H'     | $0.50 \pm 0.03$       | 14.09    | 29  |
| PVM       | $0.78 \pm 0.13$       | 5.85     | 16  |
| CORE      | $0.92 \pm 0.03$       | 1.69     | 19  |
| ITO1      | $0.22 \pm 0.06$       | 19.4     | 29  |
| ITO2      | $0.41 \pm 0.11$       | 12.6     | 19  |
| ITO3      | $0.58 \pm 0.11$       | 10.1     | 16  |
| ITO4      | $0.62 \pm 0.16$       | 9.5      | 14  |
| ITO5      | $0.55 \pm 0.18$       | 8.8      | 14  |
| ITO6      | $0.57 \pm 0.24$       | 7.1      | 12  |
| ITO7      | $0.57 \pm 0.32$       | 6.0      | 10  |
| ITO8      | $0.65 \pm 0.42$       | 4.6      | 7   |
