# Supplementary material
Source: PubMed Central journal article supplement (PMC1297683)
Supplement: pnas_0508649102_8.pdf [file pnas_0508649102_8.pdf]

**Table 1.**

| GO_term                                                   | Frequency    | Genome frequency   | Probability | Gene(s)                                                                                                                                                                                                                                               |
|-----------------------------------------------------------|--------------|--------------------|-------------|-------------------------------------------------------------------------------------------------------------------------------------------------------------------------------------------------------------------------------------------------------|
| Carbohydrate metabolism                                   | 17/69, 24.6% | 211/7,264, 2.9%    | 1.05E-11    | GAL1 GAL7 GAL10 GAL2 HXK1 HOR2 PGM2 SDH1 PYC1 GAL80 GAL3 GSY1 GLK1 GSY1 GAC1 SDH4 GPH1                                                                                                                                                                |
| Galactose metabolism                                      | 6/69, 8.6%   | 7/7,264, 0.0%      | 9.11E-11    | GAL1 GAL7 GAL10 GAL2 GAL80 GAL3                                                                                                                                                                                                                       |
| Alcohol metabolism                                        | 13/69, 18.8% | 147/7,264, 2.0%    | 1.27E-09    | GAL1 GAL7 GAL10 GAL2 ADH6 HXK1 RHR2 HOR2 PGM2 PYC1 GAL80 GAL3 GSY1                                                                                                                                                                                    |
| Monosaccharide metabolism                                 | 10/69, 14.4% | 86/7,264, 1.1%     | 9.73E-09    | GAL1 GAL7 GAL10 GAL2 HXK1 PGM2 PYC1 GAL80 GAL3 GSY1                                                                                                                                                                                                   |
| Hexose metabolism                                         | 9/69, 13.0%  | 79/7,264, 1.0%     | 6.69E-08    | GAL1 GAL7 GAL10 GAL2 HXK1 PGM2 PYC1 GAL80 GAL3                                                                                                                                                                                                        |
| Carbohydrate transport                                    | 5/69, 7.2%   | 31/7,264, 0.4%     | 1.26E-05    | GAL2 HXT6 HXT4 HXT3 HXT7                                                                                                                                                                                                                              |
| Energy derivation by oxidation of organic compounds       | 9/69, 13.0%  | 186/7,264, 2.5%    | 6.69E-05    | RHR2 HOR2 SDH1 BDH1 PYC1 GSY1 GAC1 SDH4 GPH1                                                                                                                                                                                                          |
| Energy pathways                                           | 9/69, 13.0%  | 186/7,264, 2.5%    | 6.69E-05    | RHR2 HOR2 SDH1 BDH1 PYC1 GSY1 GAC1 SDH4 GPH1                                                                                                                                                                                                          |
| Hexose transport                                          | 4/69, 5.7%   | 23/7,264, 0.3%     | 7.37E-05    | HXT6 HXT4 HXT3 HXT7                                                                                                                                                                                                                                   |
| Monosaccharide transport                                  | 4/69, 5.7%   | 23/7,264, 0.3%     | 7.37E-05    | HXT6 HXT4 HXT3 HXT7                                                                                                                                                                                                                                   |
| Response to abiotic stimulus                              | 9/69, 13.0%  | 201/7,264, 2.7%    | 0.00012     | RHR2 HOR2 AHP1 FAR1 GCY1 LAP3 HBT1 GAC1 AGP2                                                                                                                                                                                                          |
| Polyol biosynthesis                                       | 2/69, 2.8%   | 2/7,264, 0.0%      | 0.00017     | RHR2 HOR2                                                                                                                                                                                                                                             |
| Glycerol biosynthesis                                     | 2/69, 2.8%   | 2/7,264, 0.0%      | 0.00017     | RHR2 HOR2                                                                                                                                                                                                                                             |
| Fermentation                                              | 3/69, 4.3%   | 15/7,264, 0.2%     | 0.00041     | RHR2 HOR2 BDH1                                                                                                                                                                                                                                        |
| Mitochondrial electron transport, succinate to ubiquinone | 2/69, 2.8%   | 4/7,264, 0.0%      | 0.00069     | SDH1 SDH4                                                                                                                                                                                                                                             |
| Carboxylic acid metabolism                                | 9/69, 13.0%  | 257/7,264, 3.5%    | 0.00072     | ACH1 HIS4 KRS1 AGX1 HIS1 FDH1 LEU2 AGP2                                                                                                                                                                                                               |
| Organic acid metabolism                                   | 9/69, 13.0%  | 257/7,264, 3.5%    | 0.00072     | ACH1 HIS4 KRS1 AGX1 HIS1 FDH1 LEU2 AGP2                                                                                                                                                                                                               |
| Response to external stimulus                             | 9/69, 13.0%  | 259/7,264, 3.5%    | 0.00076     | RHR2 HOR2 AHP1 FAR1 GCY1 LAP3 HBT1 GAC1 AGP2                                                                                                                                                                                                          |
| Electron transport                                        | 3/69, 4.3%   | 20/7,264, 0.2%     | 0.00095     | CYB2 SDH1 SDH4                                                                                                                                                                                                                                        |
| Glycogen metabolism                                       | 3/69, 4.3%   | 25/7,264, 0.3%     | 0.0018      | GSY1 GAC1 GPH1                                                                                                                                                                                                                                        |
| Response to osmotic stress                                | 4/69, 5.7%   | 58/7,264, 0.7%     | 0.00232     | RHR2 HOR2 GCY1 AGP2                                                                                                                                                                                                                                   |
| Polyol metabolism                                         | 2/69, 2.8%   | 8/7,264, 0.1%      | 0.0027      | RHR2 HOR2                                                                                                                                                                                                                                             |
| Glycerol metabolism                                       | 2/69, 2.8%   | 8/7,264, 0.1%      | 0.0027      | RHR2 HOR2                                                                                                                                                                                                                                             |
| Energy reserve metabolism                                 | 3/69, 4.3%   | 30/7,264, 0.4%     | 0.00301     | GSY1 GAC1 GPH1<br>GAL1 GAL7 GAL10 GAL2 CYB2 ADH6 HXK1 RHR2 HOR2 PGM2 SDH1 ADE2 ACH1 BDH1 PYC1 HIS4 KRS1 NSR1 RPL34B GAL80 GAL3 HSP30 AGX1 GCY1 GLK1 HIS1 DDR48 SSE1 SHM1 FUN34 FDH1 LEU2 RPA49 GSY1 GAC1 RPL13A ECM2 RPL31A RPA34 PRC1 AGP2 SDH4 GPH1 |
| Metabolism                                                | 44/69, 63.7% | 3,391/7,264, 46.6% | 0.00318     |                                                                                                                                                                                                                                                       |
| Acylglycerol metabolism                                   | 2/69, 2.8%   | 10/7,264, 0.1%     | 0.00418     | RHR2 HOR2                                                                                                                                                                                                                                             |
| Glycerol ether metabolism                                 | 2/69, 2.8%   | 10/7,264, 0.1%     | 0.00418     | RHR2 HOR2                                                                                                                                                                                                                                             |
| Neutral lipid metabolism                                  | 2/69, 2.8%   | 10/7,264, 0.1%     | 0.00418     | RHR2 HOR2                                                                                                                                                                                                                                             |
| Triacylglycerol metabolism                                | 2/69, 2.8%   | 10/7,264, 0.1%     | 0.00418     | RHR2 HOR2                                                                                                                                                                                                                                             |
| Glycerolipid metabolism                                   | 2/69, 2.8%   | 10/7,264, 0.1%     | 0.00418     | RHR2 HOR2                                                                                                                                                                                                                                             |
| Alcohol biosynthesis                                      | 3/69, 4.3%   | 34/7,264, 0.4%     | 0.00426     | RHR2 HOR2 PYC1                                                                                                                                                                                                                                        |
| One-carbon compound metabolism                            | 2/69, 2.8%   | 11/7,264, 0.1%     | 0.00502     | SHM1 FDH1                                                                                                                                                                                                                                             |
| Glucan metabolism                                         | 3/69, 4.3%   | 37/7,264, 0.5%     | 0.00538     | GSY1 GAC1 GPH1                                                                                                                                                                                                                                        |
| Response to stimulus                                      | 11/69, 15.9% | 489/7,264, 6.7%    | 0.00619     | RHR2 HOR2 AHP1 HSP30 FAR1 GCY1 DDR48 LAP3 HBT1 GAC1 AGP2                                                                                                                                                                                              |
| Amino acid metabolism                                     | 6/69, 8.6%   | 175/7,264, 2.4%    | 0.00641     | HIS4 KRS1 AGX1 HIS1 LEU2                                                                                                                                                                                                                              |
| Histidine family amino acid metabolism                    | 2/69, 2.8%   | 14/7,264, 0.1%     | 0.00799     | HIS4 HIS1                                                                                                                                                                                                                                             |
| Protein-disulfide reduction                               | 2/69, 2.8%   | 14/7,264, 0.1%     | 0.00799     | SDH1 SDH4                                                                                                                                                                                                                                             |
| ATP synthesis coupled electron transport (sensu Eukarya)  | 2/69, 2.8%   | 14/7,264, 0.1%     | 0.00799     | SDH1 SDH4                                                                                                                                                                                                                                             |
| Histidine biosynthesis                                    | 2/69, 2.8%   | 14/7,264, 0.1%     | 0.00799     | HIS4 HIS1                                                                                                                                                                                                                                             |
| Histidine family amino acid biosynthesis                  | 2/69, 2.8%   | 14/7,264, 0.1%     | 0.00799     | HIS4 HIS1                                                                                                                                                                                                                                             |
| Histidine metabolism                                      | 2/69, 2.8%   | 14/7,264, 0.1%     | 0.00799     | HIS4 HIS1                                                                                                                                                                                                                                             |
| ATP synthesis coupled electron transport                  | 2/69, 2.8%   | 14/7,264, 0.1%     | 0.00799     | SDH1 SDH4                                                                                                                                                                                                                                             |
| Amino acid and derivative metabolism                      | 6/69, 8.6%   | 187/7,264, 2.5%    | 0.00875     | HIS4 KRS1 AGX1 HIS1 LEU2                                                                                                                                                                                                                              |
| Tricarboxylic acid cycle                                  | 2/69, 2.8%   | 15/7,264, 0.2%     | 0.00912     | SDH1 SDH4                                                                                                                                                                                                                                             |
| Branched chain family amino acid metabolism               | 2/69, 2.8%   | 16/7,264, 0.2%     | 0.01032     | LEU2                                                                                                                                                                                                                                                  |
| Amine metabolism                                          | 6/69, 8.6%   | 198/7,264, 2.7%    | 0.01137     | HIS4 KRS1 AGX1 HIS1 LEU2                                                                                                                                                                                                                              |
| Polysaccharide metabolism                                 | 3/69, 4.3%   | 50/7,264, 0.6%     | 0.01219     | GSY1 GAC1 GPH1                                                                                                                                                                                                                                        |
| Serine family amino acid metabolism                       | 2/69, 2.8%   | 20/7,264, 0.2%     | 0.01573     | AGX1                                                                                                                                                                                                                                                  |
| Amino acid biosynthesis                                   | 4/69, 5.7%   | 101/7,264, 1.3%    | 0.01579     | HIS4 AGX1 HIS1 LEU2                                                                                                                                                                                                                                   |
| Amine biosynthesis                                        | 4/69, 5.7%   | 108/7,264, 1.4%    | 0.01966     | HIS4 AGX1 HIS1 LEU2                                                                                                                                                                                                                                   |

|                                                               |              |                  |         |                                                               |
|---------------------------------------------------------------|--------------|------------------|---------|---------------------------------------------------------------|
| Anion transport                                               | 2/69, 2.8%   | 26/7,264, 0.3%   | 0.02565 | PHO84 JEN1                                                    |
| Response to chemical substance                                | 4/69, 5.7%   | 118/7,264, 1.6%  | 0.02613 | AHP1 FAR1 LAP3 HBT1                                           |
| Main pathways of carbohydrate metabolism                      | 3/69, 4.3%   | 67/7,264, 0.9%   | 0.02618 | SDH1 PYC1 SDH4                                                |
| Transcription from Pol I promoter                             | 2/69, 2.8%   | 28/7,264, 0.3%   | 0.02939 | RPA49 RPA34                                                   |
| Nicotinamide metabolism                                       | 2/69, 2.8%   | 29/7,264, 0.3%   | 0.03133 | PYC1 FDH1                                                     |
| Pyridine nucleotide metabolism                                | 2/69, 2.8%   | 31/7,264, 0.4%   | 0.03538 | PYC1 FDH1                                                     |
| Oxidative phosphorylation                                     | 2/69, 2.8%   | 34/7,264, 0.4%   | 0.0418  | SDH1 SDH4                                                     |
| Nucleotide metabolism                                         | 3/69, 4.3%   | 85/7,264, 1.1%   | 0.04746 | ADE2 PYC1 FDH1                                                |
| Response to stress                                            | 7/69, 10.1%  | 365/7,264, 5.0%  | 0.05787 | RHR2 HOR2 HSP30 GCY1 DDR48 GAC1 AGP2                          |
| Oxidoreduction coenzyme metabolism                            | 2/69, 2.8%   | 41/7,264, 0.5%   | 0.05828 | PYC1 FDH1                                                     |
| Protein folding                                               | 2/69, 2.8%   | 43/7,264, 0.5%   | 0.06335 | HSP30 SSE1                                                    |
| Carboxylic acid transport                                     | 2/69, 2.8%   | 44/7,264, 0.6%   | 0.06593 | DIP5 JEN1                                                     |
| Organic acid transport                                        | 2/69, 2.8%   | 45/7,264, 0.6%   | 0.06856 | DIP5 JEN1                                                     |
| Response to pheromone during conjugation with cellular fusion | 2/69, 2.8%   | 48/7,264, 0.6%   | 0.07662 | FAR1 HBT1                                                     |
| Coenzyme metabolism                                           | 3/69, 4.3%   | 108/7,264, 1.4%  | 0.08373 | ACH1 PYC1 FDH1                                                |
| Transport                                                     | 12/69, 17.3% | 831/7,264, 11.4% | 0.09126 | GAL2 HXT6 HXT4 HXT3 DIP5 FIT2 HXT7 FIT3 PHO84 FUN34 AGP2 JEN1 |
| Glucose metabolism                                            | 2/69, 2.8%   | 56/7,264, 0.7%   | 0.09946 | PGM2 PYC1                                                     |
