# Supplementary material
Source: PubMed Central journal article supplement (PMC1297683)
Supplement: pnas_0508649102_9.pdf [file pnas_0508649102_9.pdf]

Table 2. *P* value table for Gene Ontology cellular component.

C1: ER; C2: ER-Goli; C3: Golgi; C4: Golgi membrane; C5: bud; C6: cell; C7: cell cortex; C8: cell fraction; C9: cell wall; C10: cytoplasm; C11: cytosol; C12: endosome; C13: extracellular; C14: intracellular; C15: membrane; C16: mitochondrion; C17: nucleoplasm; C18: nucleus; C19: periplasmic space; C20: peroxisomal membrane; C21: peroxisome; C22: plasma membrane; C23: septum; C24: unknown; C25: unlocalized; C26: vacuolar membrane; C27: vacuole

|     | C1   | C2   | C3   | C4   | C5   | C6   | C7   | C8   | C9   | C10  | C11  | C12  | C13  | C14  | C15  | C16  | C17  | C18  | C19  | C20  | C21  | C22  | C23  | C24  | C25  | C26  | C27  |
|-----|------|------|------|------|------|------|------|------|------|------|------|------|------|------|------|------|------|------|------|------|------|------|------|------|------|------|------|
| C1  | 0.05 | 0.05 | 0.87 | 0.48 | 0.48 | 0.95 | 0.95 | 0.95 | 1.00 | 0.48 | 0.48 | 0.87 | 1.00 | 0.95 | 1.00 | 0.87 | 0.87 | 0.87 | 1.00 | 0.48 | 0.87 | 0.48 | 1.00 | 1.00 | 0.48 | 0.48 | 0.87 |
| C2  | 0.05 | 0.05 | 0.05 | 0.05 | 0.48 | 0.95 | 0.95 | 0.95 | 1.00 | 0.48 | 0.48 | 0.87 | 1.00 | 0.95 | 1.00 | 0.87 | 0.87 | 0.87 | 1.00 | 0.48 | 0.87 | 0.48 | 1.00 | 1.00 | 0.48 | 0.48 | 0.87 |
| C3  | 0.87 | 0.05 | 0.05 | 0.05 | 0.48 | 0.95 | 0.95 | 0.95 | 1.00 | 0.48 | 0.48 | 0.87 | 1.00 | 0.95 | 1.00 | 0.87 | 0.87 | 0.87 | 1.00 | 0.87 | 0.87 | 0.87 | 1.00 | 1.00 | 0.48 | 0.87 | 0.87 |
| C4  | 0.48 | 0.05 | 0.05 | 0.05 | 0.05 | 0.95 | 0.95 | 0.95 | 1.00 | 0.05 | 0.05 | 0.48 | 0.87 | 0.95 | 0.87 | 0.87 | 0.48 | 0.48 | 1.00 | 0.87 | 0.87 | 0.87 | 1.00 | 1.00 | 0.48 | 0.87 | 0.87 |
| C5  | 0.48 | 0.48 | 0.48 | 0.05 | 1.00 | 0.95 | 0.48 | 0.95 | 1.00 | 0.05 | 0.05 | 0.48 | 1.00 | 0.48 | 0.48 | 0.48 | 0.48 | 0.48 | 1.00 | 0.05 | 0.48 | 0.05 | 1.00 | 1.00 | 0.05 | 0.05 | 0.48 |
| C6  | 0.95 | 0.95 | 0.95 | 0.95 | 0.95 | 0.95 | 0.95 | 0.95 | 0.95 | 0.95 | 0.95 | 0.95 | 1.00 | 0.95 | 0.95 | 0.95 | 0.95 | 0.95 | 1.00 | 0.95 | 0.95 | 0.95 | 0.95 | 1.00 | 0.95 | 0.95 | 0.95 |
| C7  | 0.95 | 0.95 | 0.95 | 0.95 | 0.48 | 0.95 | 1.00 | 0.95 | 1.00 | 0.48 | 0.48 | 0.95 | 1.00 | 0.48 | 1.00 | 0.95 | 0.95 | 0.95 | 1.00 | 0.95 | 0.95 | 0.95 | 1.00 | 1.00 | 0.48 | 0.95 | 0.95 |
| C8  | 0.95 | 0.95 | 0.95 | 0.95 | 0.95 | 0.95 | 0.95 | 0.95 | 0.95 | 0.95 | 0.95 | 0.95 | 1.00 | 0.95 | 0.95 | 0.95 | 0.95 | 0.95 | 1.00 | 0.95 | 0.95 | 0.95 | 0.95 | 1.00 | 0.95 | 0.95 | 0.95 |
| C9  | 1.00 | 1.00 | 1.00 | 1.00 | 1.00 | 0.95 | 1.00 | 0.95 | 0.05 | 1.00 | 1.00 | 1.00 | 0.05 | 1.00 | 1.00 | 1.00 | 1.00 | 1.00 | 0.95 | 1.00 | 1.00 | 1.00 | 1.00 | 1.00 | 1.00 | 1.00 | 1.00 |
| C10 | 0.48 | 0.48 | 0.48 | 0.05 | 0.05 | 0.95 | 0.48 | 0.95 | 1.00 | 0.05 | 0.05 | 0.48 | 1.00 | 0.48 | 0.48 | 0.48 | 0.48 | 0.48 | 1.00 | 0.05 | 0.48 | 0.05 | 1.00 | 1.00 | 0.05 | 0.05 | 0.48 |
| C11 | 0.48 | 0.48 | 0.48 | 0.05 | 0.05 | 0.95 | 0.48 | 0.95 | 1.00 | 0.05 | 0.05 | 0.48 | 1.00 | 0.48 | 0.48 | 0.48 | 0.48 | 0.48 | 1.00 | 0.05 | 0.48 | 0.05 | 1.00 | 1.00 | 0.05 | 0.05 | 0.48 |
| C12 | 0.87 | 0.87 | 0.87 | 0.48 | 0.48 | 0.95 | 0.95 | 0.95 | 1.00 | 0.48 | 0.48 | 0.05 | 0.48 | 0.95 | 1.00 | 0.87 | 0.87 | 0.87 | 1.00 | 0.48 | 0.87 | 0.48 | 1.00 | 1.00 | 0.48 | 0.48 | 0.87 |
| C13 | 1.00 | 1.00 | 1.00 | 0.87 | 1.00 | 1.00 | 1.00 | 1.00 | 0.05 | 1.00 | 1.00 | 0.48 | 0.05 | 1.00 | 1.00 | 1.00 | 1.00 | 1.00 | 0.95 | 0.87 | 0.87 | 0.05 | 1.00 | 1.00 | 1.00 | 0.87 | 0.87 |
| C14 | 0.95 | 0.95 | 0.95 | 0.95 | 0.48 | 0.95 | 0.48 | 0.95 | 1.00 | 0.48 | 0.48 | 0.95 | 1.00 | 0.48 | 1.00 | 0.95 | 0.95 | 0.95 | 1.00 | 0.95 | 0.95 | 0.95 | 1.00 | 1.00 | 0.48 | 0.95 | 0.95 |
| C15 | 1.00 | 1.00 | 1.00 | 0.87 | 0.48 | 0.95 | 1.00 | 0.95 | 1.00 | 0.48 | 0.48 | 1.00 | 1.00 | 1.00 | 0.87 | 1.00 | 1.00 | 1.00 | 1.00 | 0.87 | 1.00 | 0.87 | 1.00 | 1.00 | 1.00 | 0.87 | 1.00 |
| C16 | 0.87 | 0.87 | 0.87 | 0.87 | 0.48 | 0.95 | 0.95 | 0.95 | 1.00 | 0.48 | 0.48 | 0.87 | 1.00 | 0.95 | 1.00 | 1.00 | 0.95 | 0.87 | 1.00 | 0.48 | 0.87 | 0.48 | 1.00 | 1.00 | 0.48 | 0.48 | 0.87 |
| C17 | 0.87 | 0.87 | 0.87 | 0.48 | 0.48 | 0.95 | 0.95 | 0.95 | 1.00 | 0.48 | 0.48 | 0.87 | 1.00 | 0.95 | 1.00 | 0.95 | 0.05 | 0.05 | 1.00 | 0.48 | 0.87 | 0.48 | 1.00 | 1.00 | 0.48 | 0.48 | 0.87 |
| C18 | 0.87 | 0.87 | 0.87 | 0.48 | 0.48 | 0.95 | 0.95 | 0.95 | 1.00 | 0.48 | 0.48 | 0.87 | 1.00 | 0.95 | 1.00 | 0.87 | 0.05 | 0.05 | 1.00 | 0.48 | 0.87 | 0.48 | 1.00 | 1.00 | 0.48 | 0.48 | 0.87 |
| C19 | 1.00 | 1.00 | 1.00 | 1.00 | 1.00 | 1.00 | 1.00 | 1.00 | 0.95 | 1.00 | 1.00 | 1.00 | 0.95 | 1.00 | 1.00 | 1.00 | 1.00 | 1.00 | 0.05 | 1.00 | 1.00 | 0.95 | 1.00 | 1.00 | 0.95 | 1.00 | 1.00 |
| C20 | 0.48 | 0.48 | 0.87 | 0.87 | 0.05 | 0.95 | 0.95 | 0.95 | 1.00 | 0.05 | 0.05 | 0.48 | 0.87 | 0.95 | 0.87 | 0.48 | 0.48 | 0.48 | 1.00 | 0.05 | 0.05 | 0.87 | 1.00 | 1.00 | 0.48 | 0.87 | 0.48 |
| C21 | 0.87 | 0.87 | 0.87 | 0.87 | 0.48 | 0.95 | 0.95 | 0.95 | 1.00 | 0.48 | 0.48 | 0.87 | 0.87 | 0.95 | 1.00 | 0.87 | 0.87 | 0.87 | 1.00 | 0.05 | 0.05 | 0.48 | 1.00 | 1.00 | 0.48 | 0.87 | 0.87 |
| C22 | 0.48 | 0.48 | 0.87 | 0.87 | 0.05 | 0.95 | 0.95 | 0.95 | 1.00 | 0.05 | 0.05 | 0.48 | 0.05 | 0.95 | 0.87 | 0.48 | 0.48 | 0.48 | 0.95 | 0.87 | 0.48 | 0.05 | 1.00 | 1.00 | 0.48 | 0.87 | 0.48 |
| C23 | 1.00 | 1.00 | 1.00 | 1.00 | 1.00 | 0.95 | 1.00 | 0.95 | 1.00 | 1.00 | 1.00 | 1.00 | 1.00 | 1.00 | 1.00 | 1.00 | 1.00 | 1.00 | 1.00 | 1.00 | 1.00 | 1.00 | 0.05 | 1.00 | 1.00 | 1.00 | 1.00 |
| C24 | 1.00 | 1.00 | 1.00 | 1.00 | 1.00 | 1.00 | 1.00 | 1.00 | 1.00 | 1.00 | 1.00 | 1.00 | 1.00 | 1.00 | 1.00 | 1.00 | 1.00 | 1.00 | 1.00 | 1.00 | 1.00 | 1.00 | 1.00 | 1.00 | 1.00 | 1.00 | 1.00 |
| C25 | 0.48 | 0.48 | 0.48 | 0.48 | 0.05 | 0.95 | 0.48 | 0.95 | 1.00 | 0.05 | 0.05 | 0.48 | 1.00 | 0.48 | 1.00 | 0.48 | 0.48 | 0.48 | 0.95 | 0.48 | 0.48 | 0.48 | 1.00 | 1.00 | 0.48 | 0.48 | 0.48 |
| C26 | 0.48 | 0.48 | 0.87 | 0.87 | 0.05 | 0.95 | 0.95 | 0.95 | 1.00 | 0.05 | 0.05 | 0.48 | 0.87 | 0.95 | 0.87 | 0.48 | 0.48 | 0.48 | 1.00 | 0.87 | 0.87 | 0.87 | 1.00 | 1.00 | 0.48 | 0.05 | 0.05 |
| C27 | 0.87 | 0.87 | 0.87 | 0.87 | 0.48 | 0.95 | 0.95 | 0.95 | 1.00 | 0.48 | 0.48 | 0.87 | 0.87 | 0.95 | 1.00 | 0.87 | 0.87 | 0.87 | 1.00 | 0.48 | 0.87 | 0.48 | 1.00 | 1.00 | 0.48 | 0.05 | 0.05 |
