# Supplementary material
Source: PubMed Central journal article supplement (PMC1297683)
Supplement: pnas_0508649102_10.pdf [file pnas_0508649102_10.pdf]

**Table 3.**

| Detection Method 2 | Detection method 1          |                                          |                         |
|--------------------|-----------------------------|------------------------------------------|-------------------------|
|                    | Small scale experiments (S) | Multiple high-throughput experiments (M) | PVM (R)                 |
| S                  | $7.616 \times 10^{-6}$      | $1.001 \times 10^{-10}$                  | $2.844 \times 10^{-10}$ |
| M                  |                             | $1.315 \times 10^{-5}$                   | $4.910 \times 10^{-10}$ |
| R                  |                             |                                          | $3.735 \times 10^{-5}$  |

Note that  $S(S, M, R | PP \notin H) = 3.740 \times 10^{-15}$  and  $S(H | PP \notin H) = 2.921 \times 10^{-4}$
