# Supplementary material
Source: PubMed Central journal article supplement (PMC1297683)
Supplement: pnas_0508649102_11.pdf [file pnas_0508649102_11.pdf]

**Table 4.**

| Biomodule ID | Proteins    | GO Biological process                                                                                                                                    |                      |
|--------------|-------------|----------------------------------------------------------------------------------------------------------------------------------------------------------|----------------------|
| Biomodule 1  | UGA3        | Regulation of transcription from Pol II promoter<br>Nitrogen utilization                                                                                 |                      |
|              | CHA4        | Regulation of transcription, DNA-dependent<br>Amino acid catabolism                                                                                      |                      |
|              | DAL81       | Regulation of transcription from Pol II promoter<br>Nitrogen utilization                                                                                 |                      |
|              | LYS14       | Lysine biosynthesis, aminoacidic pathway                                                                                                                 |                      |
| Biomodule 2  | DIP5        | Amino acid transport                                                                                                                                     |                      |
|              | SUP35       | Translational termination                                                                                                                                |                      |
|              | EFT1        | Translational elongation                                                                                                                                 |                      |
|              | GCD11       | Translational initiation                                                                                                                                 |                      |
|              | RIA1        | Ribosome biogenesis                                                                                                                                      |                      |
|              | TEF2        | Translational elongation                                                                                                                                 |                      |
|              | FUN12       | Translational initiation                                                                                                                                 |                      |
|              | PMC1        | Calcium ion transport<br>Calcium ion homeostasis                                                                                                         |                      |
|              | SPF1        | Protein amino acid glycosylation<br>Calcium ion homeostasis                                                                                              |                      |
| YOR291W      |             |                                                                                                                                                          |                      |
| Biomodule 3  | LAS17       | Cytokinesis<br>Endocytosis<br>Response to osmotic stress<br>Actin filament organization<br>Polar budding<br>Actin polymerization and/or depolymerization |                      |
|              | RVS167      | Endocytosis<br>Response to osmotic stress<br>Polar budding                                                                                               |                      |
|              | AGP2        | Fatty acid metabolism<br>Response to osmotic stress                                                                                                      |                      |
|              | HOR2        | Carbohydrate metabolism<br>Response to osmotic stress<br>Glycerol biosynthesis                                                                           |                      |
|              | RHR2        | Glycerol metabolism<br>Response to osmotic stress<br>Glycerol biosynthesis                                                                               |                      |
|              | SKN7        | Response to oxidative stress<br>Response to osmotic stress<br>Transcription                                                                              |                      |
|              | Biomodule 4 | SSB1                                                                                                                                                     | Protein biosynthesis |
|              |             | SSB2                                                                                                                                                     | Protein biosynthesis |
|              |             | DPS1                                                                                                                                                     | Protein biosynthesis |
|              |             | RPL13A                                                                                                                                                   | Protein biosynthesis |
| RPL31A       |             | Protein biosynthesis                                                                                                                                     |                      |
| RPL5         |             | Protein biosynthesis<br>Ribosomal large subunit assembly and maintenance                                                                                 |                      |
| Biomodule 5  | ACC1        | Fatty acid biosynthesis<br>Nuclear membrane organization and biogenesis                                                                                  |                      |
|              | DUR1,2      | Urea metabolism                                                                                                                                          |                      |
|              | URA2        | Pyrimidine base biosynthesis                                                                                                                             |                      |
|              | CPA1        | Arginine biosynthesis                                                                                                                                    |                      |
|              | CPA2        | Arginine biosynthesis                                                                                                                                    |                      |
|              | PYC2        | NADPH regeneration                                                                                                                                       |                      |

|             |       |                                                                                                                                                                     |
|-------------|-------|---------------------------------------------------------------------------------------------------------------------------------------------------------------------|
|             | URA8  | Gluconeogenesis<br>Pyrimidine base biosynthesis<br>Phospholipid biosynthesis                                                                                        |
|             | ABZ1  | Para-aminobenzoic acid metabolism                                                                                                                                   |
|             | GLC7  | Negative regulation of transcription from Pol II promoter<br>Glycogen metabolism<br>Mitotic spindle checkpoint<br>Meiosis<br>Response to heat<br>Filamentous growth |
|             | GAC1  | Negative regulation of transcription from Pol II promoter<br>Glycogen metabolism<br>Mitotic spindle checkpoint<br>Meiosis<br>Response to heat                       |
| Biomodule 6 | GSY2  | Glycogen metabolism                                                                                                                                                 |
|             | GSY1  | Glycogen metabolism                                                                                                                                                 |
|             | PGM1  | Glucose 1-phosphate utilization<br>Glucose 6-phosphate utilization<br>Glycogen metabolism<br>Trehalose biosynthesis<br>Galactose metabolism                         |
|             | PGM2  | Glucose 1-phosphate utilization<br>Glucose 6-phosphate utilization<br>Glycogen metabolism<br>Trehalose biosynthesis<br>Galactose metabolism                         |
|             | TPK3  | Protein amino acid phosphorylation<br>Pseudohyphal growth                                                                                                           |
|             | PHO85 | Protein amino acid phosphorylation<br>Phosphate metabolism<br>Cell cycle<br>Glycogen metabolism                                                                     |
|             | PKH2  | Protein amino acid phosphorylation<br>MAPKKK cascade (cell wall biogenesis)                                                                                         |
|             | SPS1  | Sporulation (sensu Saccharomyces)<br>Protein amino acid phosphorylation                                                                                             |
|             | TPK1  | Pseudohyphal growth<br>Protein amino acid phosphorylation<br>RAS protein signal transduction                                                                        |
| Biomodule 7 | DBF20 | Protein amino acid phosphorylation<br>Cell cycle                                                                                                                    |
|             | SLT2  | Protein amino acid phosphorylation<br>Signal transduction                                                                                                           |
|             | YCK1  | Protein amino acid phosphorylation<br>Signal transduction                                                                                                           |
|             | KSS1  | Protein amino acid phosphorylation<br>Cell cycle arrest<br>Pseudohyphal growth                                                                                      |
|             | PPT1  | Protein amino acid phosphorylation                                                                                                                                  |
|             | SSK2  | Activation of MAPKK (osmolarity sensing)<br>MAPKKK cascade (osmolarity sensing)<br>Protein amino acid phosphorylation<br>Osmosensory signaling pathway              |
| Biomodule 8 | GAL80 | Galactose metabolism<br>Regulation of transcription, DNA-dependent                                                                                                  |
|             | GAL1  | Galactose metabolism                                                                                                                                                |

|              |                                                                                                                                          |                                                                                                                                                                      |
|--------------|------------------------------------------------------------------------------------------------------------------------------------------|----------------------------------------------------------------------------------------------------------------------------------------------------------------------|
|              | GAL3                                                                                                                                     | Galactose metabolism<br>Regulation of transcription, DNA-dependent                                                                                                   |
|              | GAL4                                                                                                                                     | Galactose metabolism<br>Regulation of transcription, DNA-dependent                                                                                                   |
|              | GAL10                                                                                                                                    | Galactose metabolism                                                                                                                                                 |
|              | GAL2                                                                                                                                     | Galactose metabolism<br>Extracellular carbohydrate transport                                                                                                         |
|              | GAL7                                                                                                                                     | Galactose metabolism                                                                                                                                                 |
| Biomodule 9  | ARA1                                                                                                                                     | Carbohydrate metabolism                                                                                                                                              |
|              | GLK1                                                                                                                                     | Carbohydrate metabolism                                                                                                                                              |
|              | GLO2                                                                                                                                     | Carbohydrate metabolism                                                                                                                                              |
|              | MAL33                                                                                                                                    | Maltose metabolism<br>Carbohydrate metabolism                                                                                                                        |
|              |                                                                                                                                          | Regulation of transcription, DNA-dependent                                                                                                                           |
| Biomodule 10 | CDC28                                                                                                                                    | G2/M transition of mitotic cell cycle<br>Regulation of cell cycle<br>G1/S transition of mitotic cell cycle<br>S phase of mitotic cell cycle<br>Regulation of meiosis |
|              | CLN1                                                                                                                                     | Regulation of CDK activity<br>G1/S transition of mitotic cell cycle                                                                                                  |
|              | FAR1                                                                                                                                     | Cell cycle arrest                                                                                                                                                    |
|              | MCM1                                                                                                                                     | Regulation of transcription from Pol II promoter                                                                                                                     |
|              | SMP1                                                                                                                                     | Transcription                                                                                                                                                        |
|              |                                                                                                                                          |                                                                                                                                                                      |
| Biomodule 11 | GBP2                                                                                                                                     | Biological_process unknown                                                                                                                                           |
|              | LHP1                                                                                                                                     | tRNA processing                                                                                                                                                      |
|              | NOP13                                                                                                                                    | Biological_process unknown                                                                                                                                           |
|              | CUS2                                                                                                                                     | mRNA splicing                                                                                                                                                        |
|              | MRD1                                                                                                                                     | 35S primary transcript processing                                                                                                                                    |
|              | MUD1                                                                                                                                     | mRNA splicing                                                                                                                                                        |
|              | NOP8                                                                                                                                     | Ribosomal large subunit assembly and maintenance<br>rRNA processing                                                                                                  |
|              | STO1                                                                                                                                     | mRNA splicing                                                                                                                                                        |
|              | NPL3                                                                                                                                     | mRNA-nucleus export                                                                                                                                                  |
|              | PAB1                                                                                                                                     | Regulation of translational initiation                                                                                                                               |
|              | HRP1                                                                                                                                     | mRNA cleavage<br>mRNA polyadenylation                                                                                                                                |
|              | MSL1                                                                                                                                     | mRNA splicing                                                                                                                                                        |
|              | PUB1                                                                                                                                     | mRNA catabolism, nonsense-mediated                                                                                                                                   |
|              | IST3                                                                                                                                     | Spliceosome assembly                                                                                                                                                 |
|              | NAB3                                                                                                                                     | Regulation of transcription from Pol II promoter                                                                                                                     |
|              | MOT2                                                                                                                                     | Regulation of transcription from Pol II promoter<br>Poly(A) tail shortening                                                                                          |
|              | CWC22                                                                                                                                    | Biological_process unknown                                                                                                                                           |
|              | YRA1                                                                                                                                     | Poly(A)+ mRNA-nucleus export                                                                                                                                         |
|              | MIP6                                                                                                                                     | mRNA-nucleus export                                                                                                                                                  |
|              | DBP3                                                                                                                                     | Ribosomal large subunit assembly and maintenance<br>35S primary transcript processing                                                                                |
|              | NMD2                                                                                                                                     | mRNA catabolism<br>mRNA catabolism, nonsense-mediated                                                                                                                |
|              | SGD1                                                                                                                                     | Osmoregulation                                                                                                                                                       |
|              | NOG2                                                                                                                                     | mRNA splicing                                                                                                                                                        |
| NOP1         | rRNA modification<br>Ribosomal large subunit assembly and maintenance<br>35S primary transcript processing<br>Processing of 20S pre-rRNA |                                                                                                                                                                      |
| DBP2         | Biological_process unknown                                                                                                               |                                                                                                                                                                      |

|              |         |                                                                                                                                                                                                                                                                                                                                                                                                                                                                                                                                                                                          |
|--------------|---------|------------------------------------------------------------------------------------------------------------------------------------------------------------------------------------------------------------------------------------------------------------------------------------------------------------------------------------------------------------------------------------------------------------------------------------------------------------------------------------------------------------------------------------------------------------------------------------------|
| Biomodule 12 | EMI2    | Biological_process unknown                                                                                                                                                                                                                                                                                                                                                                                                                                                                                                                                                               |
|              | HXK1    | Fructose metabolism                                                                                                                                                                                                                                                                                                                                                                                                                                                                                                                                                                      |
|              | HXK2    | Fructose metabolism                                                                                                                                                                                                                                                                                                                                                                                                                                                                                                                                                                      |
|              | YDL036C |                                                                                                                                                                                                                                                                                                                                                                                                                                                                                                                                                                                          |
| Biomodule 13 | YML131W |                                                                                                                                                                                                                                                                                                                                                                                                                                                                                                                                                                                          |
|              | YNL134C |                                                                                                                                                                                                                                                                                                                                                                                                                                                                                                                                                                                          |
|              | ADH6    | Aldehyde metabolism<br>Alcohol metabolism                                                                                                                                                                                                                                                                                                                                                                                                                                                                                                                                                |
|              | YIM1    | Mitochondrial processing                                                                                                                                                                                                                                                                                                                                                                                                                                                                                                                                                                 |
|              | AST2    | Biological_process unknown                                                                                                                                                                                                                                                                                                                                                                                                                                                                                                                                                               |
|              | YAL061W |                                                                                                                                                                                                                                                                                                                                                                                                                                                                                                                                                                                          |
|              | AST1    | Protein-membrane targeting                                                                                                                                                                                                                                                                                                                                                                                                                                                                                                                                                               |
|              | SFA1    | Formaldehyde assimilation                                                                                                                                                                                                                                                                                                                                                                                                                                                                                                                                                                |
| Biomodule 14 | ADH5    | Alcohol metabolism                                                                                                                                                                                                                                                                                                                                                                                                                                                                                                                                                                       |
|              | BEM1    | Establishment of cell polarity (sensu Saccharomyces)                                                                                                                                                                                                                                                                                                                                                                                                                                                                                                                                     |
|              | ABP1    | Establishment of cell polarity (sensu Saccharomyces)<br>Actin cortical patch assembly                                                                                                                                                                                                                                                                                                                                                                                                                                                                                                    |
|              | ACT1    | Cytokinesis<br>Exocytosis<br>Endocytosis<br>Response to osmotic stress<br>Vacuole inheritance<br>Spindle assembly<br>Mitotic spindle orientation<br>Mitochondrion inheritance<br>Cell wall organization and biogenesis<br>Apical bud growth<br>Isotropic bud growth<br>Establishment of cell polarity (sensu Saccharomyces)<br>Protein secretion<br>Vesicle transport along actin filament<br>Cell cycle dependent actin filament reorganization<br>Sporulation (sensu Saccharomyces)<br>Histone acetylation<br>Histone modification<br>Regulation of transcription from Pol II promoter |
|              | CDC24   | Chitin localization<br>Apical bud growth<br>Isotropic bud growth<br>Pseudohyphal growth<br>Invasive growth<br>Small GTPase mediated signal transduction<br>Establishment of cell polarity (sensu Saccharomyces)                                                                                                                                                                                                                                                                                                                                                                          |
|              | CDC42   | Exocytosis<br>Apical bud growth<br>Isotropic bud growth<br>Pseudohyphal growth<br>Invasive growth<br>Rho protein signal transduction<br>Establishment of cell polarity (sensu Saccharomyces)                                                                                                                                                                                                                                                                                                                                                                                             |
|              | CDC12   | Cytokinesis<br>Cell wall organization and biogenesis<br>Axial budding<br>Polar budding<br>Establishment of cell polarity (sensu Saccharomyces)                                                                                                                                                                                                                                                                                                                                                                                                                                           |
|              | SSA1    | Protein-nucleus import, translocation<br>Protein folding                                                                                                                                                                                                                                                                                                                                                                                                                                                                                                                                 |

|              |         |                                                                                                                                                                                                                               |
|--------------|---------|-------------------------------------------------------------------------------------------------------------------------------------------------------------------------------------------------------------------------------|
| Biomodule 15 | SSA2    | SRP-dependent, co-translational membrane targeting, translocation<br>Protein folding                                                                                                                                          |
|              | SSE2    | SRP-dependent, co-translational membrane targeting, translocation<br>Protein folding                                                                                                                                          |
|              | KAR2    | SRP-dependent, co-translational membrane targeting, translocation                                                                                                                                                             |
|              | PRC1    | Vacuolar protein catabolism                                                                                                                                                                                                   |
|              | SEC61   | SRP-dependent, co-translational membrane targeting, translocation                                                                                                                                                             |
| Biomodule 16 | SSA3    | Protein folding<br>SRP-dependent, co-translational membrane targeting, translocation<br>Response to stress                                                                                                                    |
|              | SSA4    | SRP-dependent, co-translational membrane targeting, translocation<br>Response to stress<br>Protein folding                                                                                                                    |
|              | DOG2    | Glucose metabolism<br>Response to stress                                                                                                                                                                                      |
|              | HSF1    | Response to stress<br>Response to heat                                                                                                                                                                                        |
|              | HSP30   | Response to stress<br>Protein folding                                                                                                                                                                                         |
| Biomodule 17 | PSR2    | Response to stress                                                                                                                                                                                                            |
|              | ASH1    | Regulation of transcription, mating-type specific<br>Pseudohyphal growth                                                                                                                                                      |
|              | FKH1    | Chromatin modeling<br>Chromatin silencing<br>Chromatin silencing at silent mating type cassettes (sensu Fungi)<br>Chromatin silencing at HML and HMR (sensu Saccharomyces)<br>Pseudohyphal growth<br>Regulation of cell cycle |
|              | HMS2    | Pseudohyphal growth                                                                                                                                                                                                           |
|              | PHD1    | Pseudohyphal growth                                                                                                                                                                                                           |
|              | SOK2    | Pseudohyphal growth                                                                                                                                                                                                           |
|              | NSR1    | Ribosomal small subunit assembly and maintenance<br>rRNA processing                                                                                                                                                           |
| Biomodule 18 | UTP4    | processing of 20S pre-rRNA                                                                                                                                                                                                    |
|              | NOP4    | rRNA processing                                                                                                                                                                                                               |
|              | PWP1    | Biological_process unknown                                                                                                                                                                                                    |
|              | UTP13   | Processing of 20S pre-rRNA                                                                                                                                                                                                    |
|              | RRB1    | Ribosome biogenesis                                                                                                                                                                                                           |
|              | NOP12   | rRNA metabolism                                                                                                                                                                                                               |
|              | SIK1    | rRNA modification                                                                                                                                                                                                             |
|              | NOP15   | 35S primary transcript processing<br>Processing of 20S pre-rRNA<br>Ribosomal large subunit biogenesis                                                                                                                         |
|              | NOP58   | rRNA modification<br>35S primary transcript processing<br>Processing of 20S pre-rRNA                                                                                                                                          |
|              | NUG1    | Biological_process unknown                                                                                                                                                                                                    |
|              | HAS1    | Biological_process unknown                                                                                                                                                                                                    |
| Biomodule 19 | NOP7    | Ribosomal large subunit biogenesis                                                                                                                                                                                            |
|              | SDP1    | MAPKKK cascade (cell wall biogenesis)                                                                                                                                                                                         |
|              | YPL247C |                                                                                                                                                                                                                               |
|              | GIP2    | Biological_process unknown                                                                                                                                                                                                    |
| Biomodule 20 | PIG2    | Biological_process unknown                                                                                                                                                                                                    |
|              | SEC17   | ER to Golgi transport                                                                                                                                                                                                         |
| Biomodule 20 | GIP1    | Spore wall assembly (sensu Saccharomyces)                                                                                                                                                                                     |
|              | GRE3    | Response to stress<br>Arabinose metabolism                                                                                                                                                                                    |

|         |                      |
|---------|----------------------|
| YPR1    | Arabinose metabolism |
| GCY1    | Salinity response    |
| YJR096W |                      |
| YPR127W |                      |

---
