# Supplementary material
Source: PubMed Central journal article supplement (PMC1297683)
Supplement: pnas_0508649102_12.pdf [file pnas_0508649102_12.pdf]

**Table 5.**

| <b>Biomodule ID</b> | <b>Proteins</b>                                         | <b>Representative Gene Ontology biological process</b>                                                    |
|---------------------|---------------------------------------------------------|-----------------------------------------------------------------------------------------------------------|
| <b>Biomodule 8</b>  | GAL80, GAL1, GAL2, GAL3, GAL4, GAL7, GAL10              | Galactose metabolism                                                                                      |
| <b>Biomodule 1</b>  | UGA3, CHA4, DAL81, LYS14, LAS17                         | Nitrogen utilization, AA catabolism, Lys biosynthesis                                                     |
| <b>Biomodule 3</b>  | RVS167, AGP2, HOR2, RHR2, SKN7                          | Endocytosis, response to osmotic stress, actin filament organization, glycerol metabolism/synthesis       |
| <b>Biomodule 5</b>  | ACC1, DUR1,2, URA2, CPA1, CPA2, PYC2, URA8, ABZ1        | Urea metabolism, pyrimidine base biosynthesis, arginine biosynthesis, NADPH regeneration, gluconeogenesis |
| <b>Biomodule 6</b>  | GLC7, GAC1, GSY1, GSY2, PGM1, PGM2                      | Glycogen metabolism                                                                                       |
| <b>Biomodule 9</b>  | ARA1, GLK1, GLO2, MAL33                                 | Carbohydrate metabolism, maltose metabolism                                                               |
| <b>Biomodule 12</b> | EMI2, HXK1, HXK2, YDL036C                               | Fructose metabolism                                                                                       |
| <b>Biomodule 13</b> | YML131W, YNL134C, ADH6, YIM1, AST2, YAL061W, AST1, SFA1 | Aldehyde/alcohol metabolism, formaldehyde assimilation, protein-membrane targeting                        |
| <b>Biomodule 19</b> | GIP2, PIG2, SEC17, GIP1                                 | Protein phosphatase, protein transport.                                                                   |
| <b>Biomodule 20</b> | GRE3, YPR1, GCY1, YJR096W, YPR127W                      | Response to stress, salinity response, arabinose metabolism                                               |
