# Supplementary material
Source: PubMed Central journal article supplement (PMC1297683)
Supplement: pnas_0508649102_13.pdf [file pnas_0508649102_13.pdf]

**Table 6.**

| Factor name     | Consensus                                      |
|-----------------|------------------------------------------------|
| ABF1-A          | [AG]TC[AG][CT]NNNNNACG                         |
| ABF1-B          | TATCATTNNNACGA                                 |
| ABF3            | ACAAATGGTGTAAAAGAC                             |
| ADR1            | GGAGAN(1,12)TCTCC                              |
| AFT1            | [CT][AG]CACCC[AG]                              |
| ARGR1           | CACCTCTA                                       |
| ARR1            | TTACTAA                                        |
| BAS1/CAT8       | TGACTC                                         |
| BAS2/PHO2/GRF10 | AAA[AT][GT]AGTTAATT[AG]A[AT]T                  |
| CAD1/YAP2       | TTACTAA                                        |
| CBF1-A          | [AG]TCAC[AG]TG                                 |
| CBF1-B          | [AG]TCAC[AG]TGA                                |
| CBF1-C          | AA[AT]T[AT]A[AG][AT]CAC[AG]TGATA[AT]A[AT][AT]T |
| CCBF            | NN[CT]CACGAAAA                                 |
| CIN5/YAP4       | TTACTAA                                        |
| DAL80/81/GLN3   | GATAAGN(21)GATAAG                              |
| GAL4-A          | CGGN(11)CCG                                    |
| GAL4-B          | CGGA[CG]GACAGTC[CG]TCCG                        |
| GCN4-A          | ATGACTCAT                                      |
| GCN4-B          | [AG][AG]TGACTCA                                |
| GCN4-C          | GACTCA                                         |
| GCR1/2/3        | C[AT]TCC[AT]                                   |
| GFI             | [AG]TC[AG][CT][CT][CT]NNNACG                   |
| GFII            | [AG]TCAC[AG]TG                                 |
| GRF1/RAP1       | [AG][AC]ACCCANNCA[CT][CT]                      |
| GRF2/REB1-A     | CCGGGTAA                                       |
| GRF2/REB1-B     | [CT]NN[CT][CT]ACCCG                            |
| GRF2/REB1-C     | [CT]NN[CT][CT]ACCCT                            |
| GRF10/BAS2/PHO2 | AAA[AT][GT]AGTTAATT[AG]A[AT]                   |
| GZF3            | GATAAC                                         |
| HAP1-A          | CGGN(6)CGG                                     |
| HAP1-B          | CGGNNNTANCGG                                   |
| HAP1-C          | CGCNNNTANCGC                                   |
| HAP1-D          | TGGCCGGGGTTTACGGACGATGA                        |
| HAP1-E          | GCTAATAGCGATAATAGCGAGGG                        |
| HAP2            | TNATTGGT                                       |
| HAP2/3/4        | TN[AG]TTGGT                                    |
| HO              | TNNN[CT]GC{GA}N{CA}AN{TG}                      |
| HSF1-A          | CNNGAANNTTCNNG                                 |
| HSF1-B          | GAAN(2,3)TTC                                   |
| HSF1-C          | TTCTAGAA                                       |
| IME1            | T[AG]G[CG]CG[GC]C[GT]A                         |
| INO2            | CATGTGAAAT                                     |
| LEU3            | GCCGNNNNCGGC                                   |
| LYS14           | [AT][AT][AT]TCC[AG]N[CT]GGA[CT][CT][CT]        |
| MATalpha1       | TCAATGNCAG                                     |
| MATalpha2-A     | CATGTAANNNNNNNNNNNNNNNNTTACATG                 |

---

|                 |                               |
|-----------------|-------------------------------|
| MATalpha2-B     | GCTTCCCAATGTAAAAGTACATCATAG   |
| MATalpha2-C     | [CT]C[AG]TGTNN[AT]NANNTACATCA |
| MATalpha1-Q-BOX | TTGA[AT]GG                    |
| MBP1/MBF1       | ACGCGTNA                      |
| MCM1/PRTF/GRM   | CCTAATT[AG]GG                 |
| MET4            | TGGCAAATG                     |
| MET31/32        | AAACTGTGG                     |
| MIG1-A          | GCGGGG                        |
| MIG1-B          | [AT][AT][AT][AT][CG][CT]GGGG  |
| MSN2/4          | CCCCT                         |
| MTF1-A          | TATAAT                        |
| MTF1-B          | TATAAA                        |
| MTF1-C          | ATATAAGTA                     |
| MTF2            | TATAAGTA                      |
| OCR1-A          | CAAGTGCCGTGCATAATGATGTGGGT    |
| OCR1-B          | TACGTCTTTGTCATTATATACCCAAAGG  |
| OCR1-C          | TCGTATTTAGTGATTATAATAC        |
| PHO2/BAS2/GRF10 | AAA[AT][GT]AGTTAATT[AG]A[AT]T |
| PHO4            | CACGTG                        |
| PDR1            | CCGCGG                        |
| PDR3            | CCGCGG                        |
| PPR1            | CGGN(2,1)CCG                  |
| PUT3            | CGGN(10)CCG                   |
| RAP1-A          | CAAAAACCCAT                   |
| RAP1-B          | AAAAACCCA                     |
| RAP1-C          | [AG][AC]ACCCANNCA[CT][CT]     |
| REB1-A          | CCGGGTAA                      |
| REB1-B          | TTTTTACCCG                    |
| REB2            | TCTATTATAATATACGATGA          |
| RLM1            | CTA[TA][TA][TA][TA]TAG        |
| RME1            | G[AT]ACCTCAA[AG]A             |
| ROX1/REO1       | [CT]NN[CT][CT]ACCCG           |
| RPN4            | GGTGGCAAAA                    |
| SBF-B           | [AG]NN[CT]CACGAAAA            |
| SKO1            | [GT][GT]ACGTC[AT]             |
| SMP1            | ACTACTA[TA][TA][TA][TA]TAG    |
| STE12-A         | [AG]TGAAACA                   |
| STE12-B         | TGAAACA                       |
| SWI4            | CACGAAAA                      |
| TBF1            | TTAGGG                        |
| TFIID-TBP-A     | TATAA                         |
| TFIID-TBP-B     | TATAAA                        |
| TFIID-TBP-C     | TATATAAA                      |
| TFIID-TBP-D     | TATTTAA                       |
| TFIIIA-A        | GNGN(2)GNGGGNG                |
| TFIIIA-B        | GNGGGNGNG                     |
| TFIIIB          | [CT]CACCA                     |
| TFIIIC-A-Box    | AGTGGCANNAGT                  |
| TFIIIC-B-Box-A  | GGTTCGANTCC                   |
| TFIIIC-B-Box-B  | GGTTCAANTCC                   |

---

---

|        |                 |
|--------|-----------------|
| THI5-A | GAGATT          |
| THI5-B | GAAAATG         |
| TSF1   | CCCCT           |
| TUF1   | ACACCCATACATTT  |
| Ty2BF  | GTCATCATAGA[CT] |
| UVind  | ATGATT          |
| yAP1   | [CG]TGACT[AC]A  |
| yATF-B | [GT][AT]CGTCA   |

binding site predictions from Jennifer 10/09/03

|           |                                         |
|-----------|-----------------------------------------|
| PIP2-OAF1 | CGGN(3)TN[AG]N(8,12)CCG                 |
| ADR1      | C[TC]CC[AG][ATG]N(4,36)[TAC][TC]GG[AG]G |
| HAP4-A    | TN[AG]TTGGT                             |
| HAP4-B    | TGATTGGT                                |
| YAP6      | TTACTAA                                 |
| CAT8      | [CT]CGGA[CT][AG][AG]A[AT]GG             |
| LYS14     | [AT][AT][AT]TCC[AG]N[CT]GGA[AT][AT][AT] |
| MCM1      | CCNNN[AT][AT][AG]GG                     |

---
