# Supplementary material
Source: PubMed Central journal article supplement (PMC1297683)
Supplement: pnas_0508649102_16.pdf [file pnas_0508649102_16.pdf]

GO Slim tree for a GO term cluster including 77 genes out of 997 genes reported in Ideker et al<sup>2</sup>.

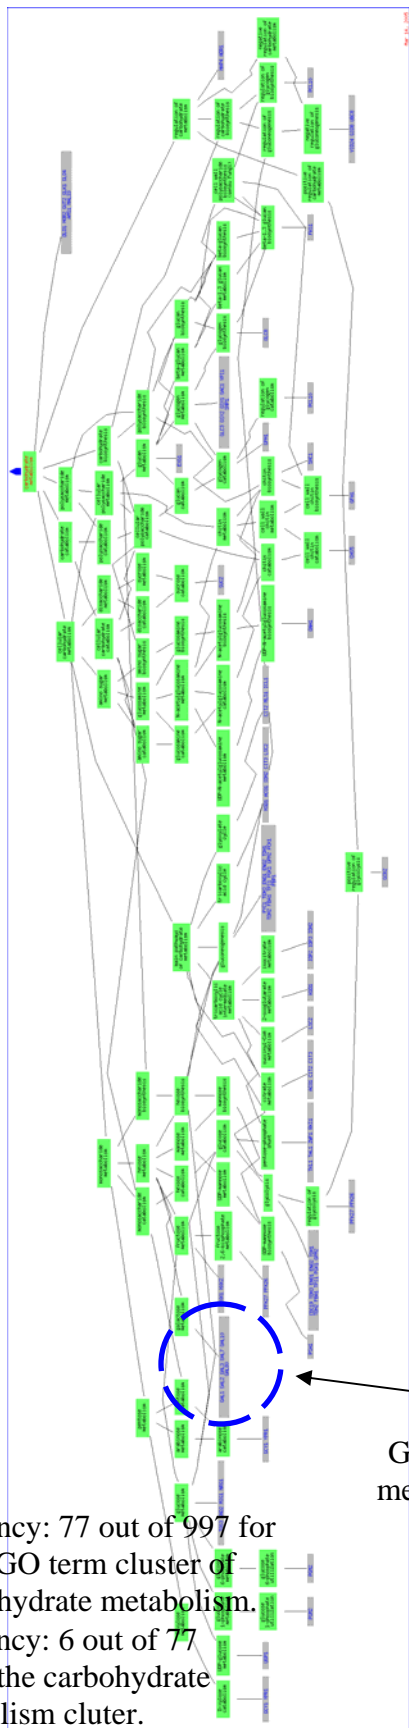

- Frequency: 77 out of 997 for the GO term cluster of carbohydrate metabolism.
- Frequency: 6 out of 77 within the carbohydrate metabolism cluster.

Galactose metabolism

GO term tree for 69 genes identified by Pointillist.

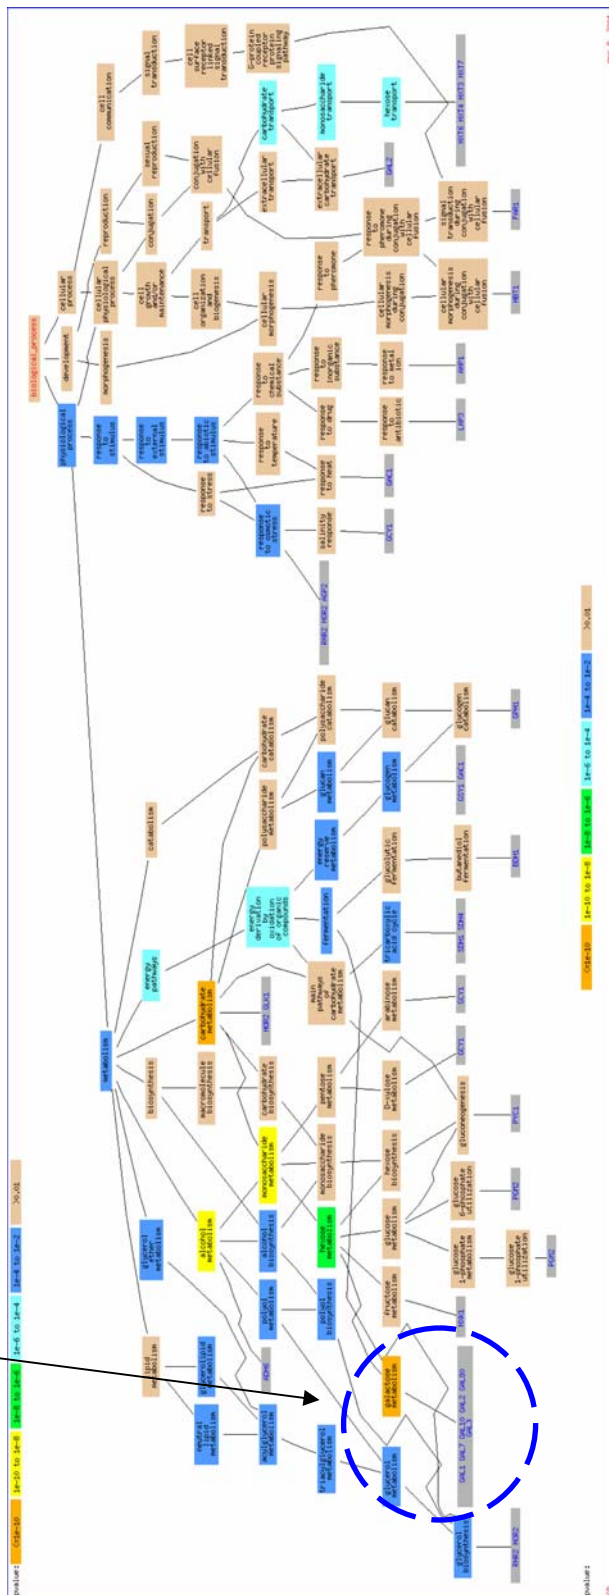

- Frequency: 6 out of 69.
- GO term Probability: 9e-11
