# Supplementary material
Source: PubMed Central journal article supplement (PMC1297683)

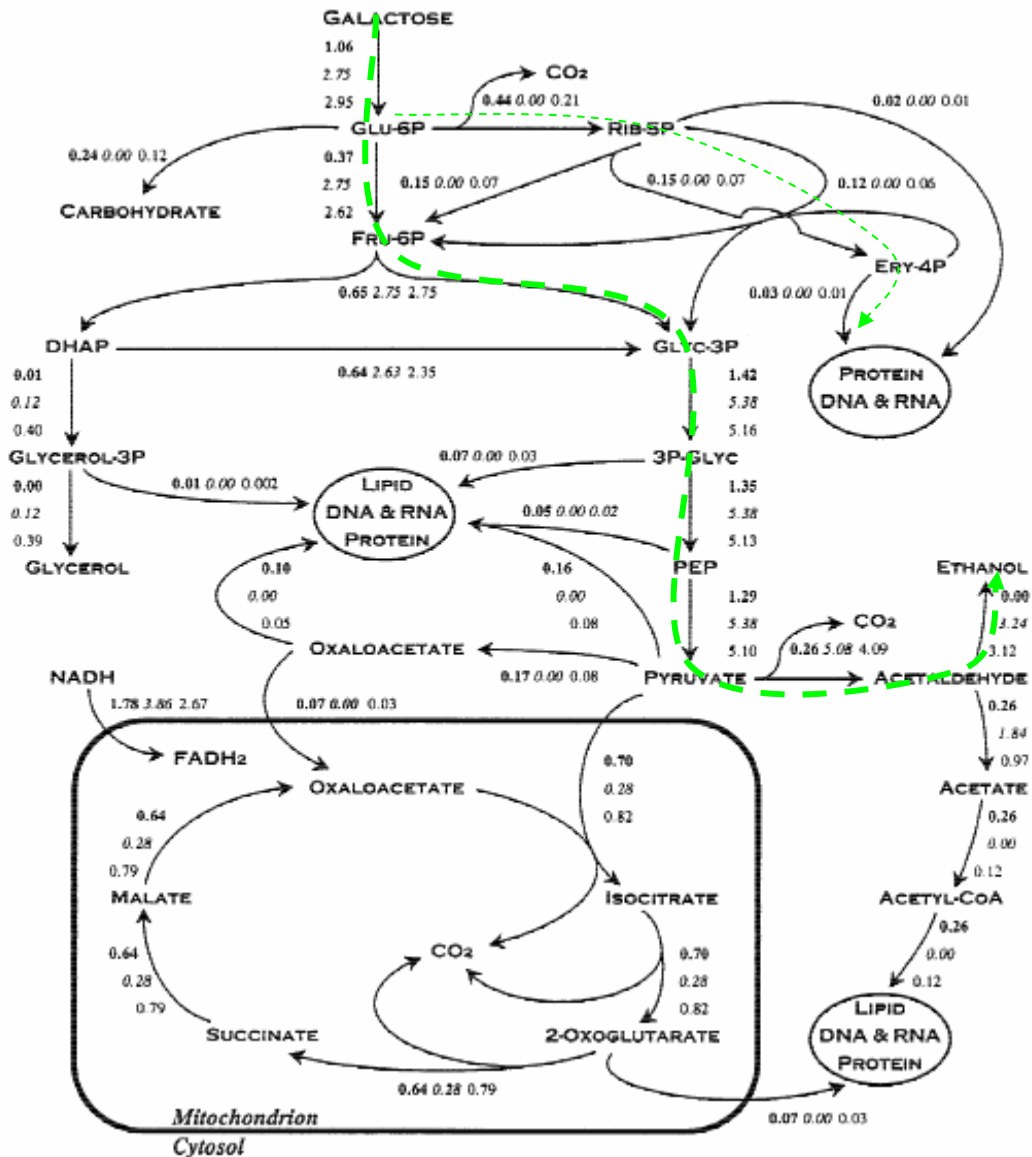

Supplement: pnas_0508649102_15.pdf [file pnas_0508649102_15.pdf]

**A**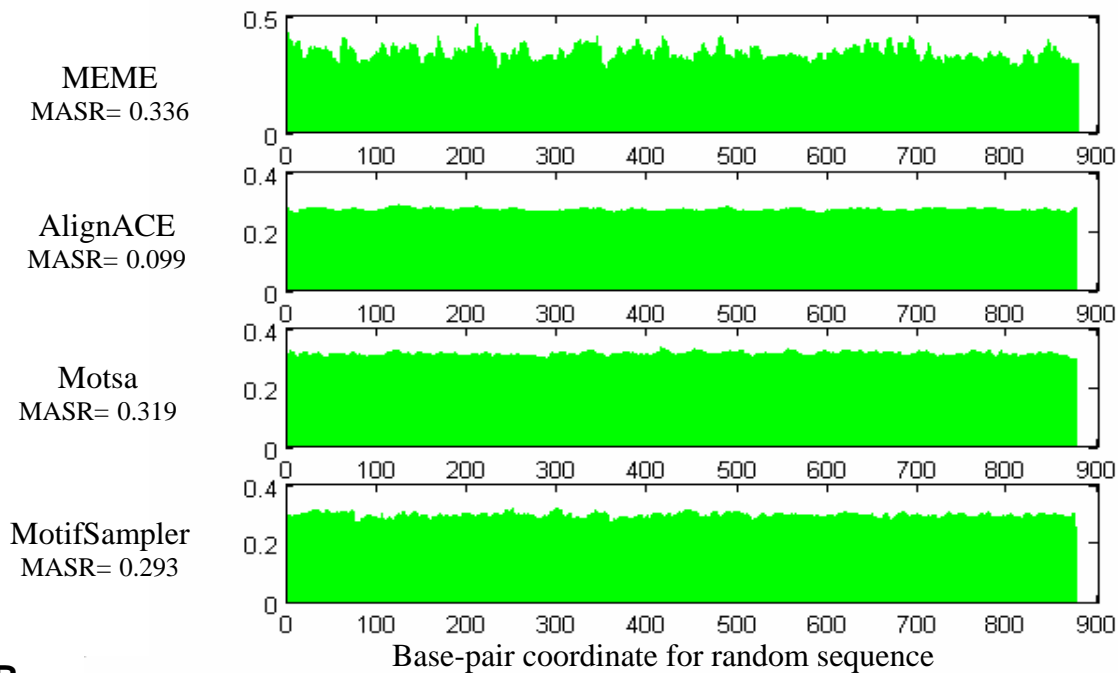**B**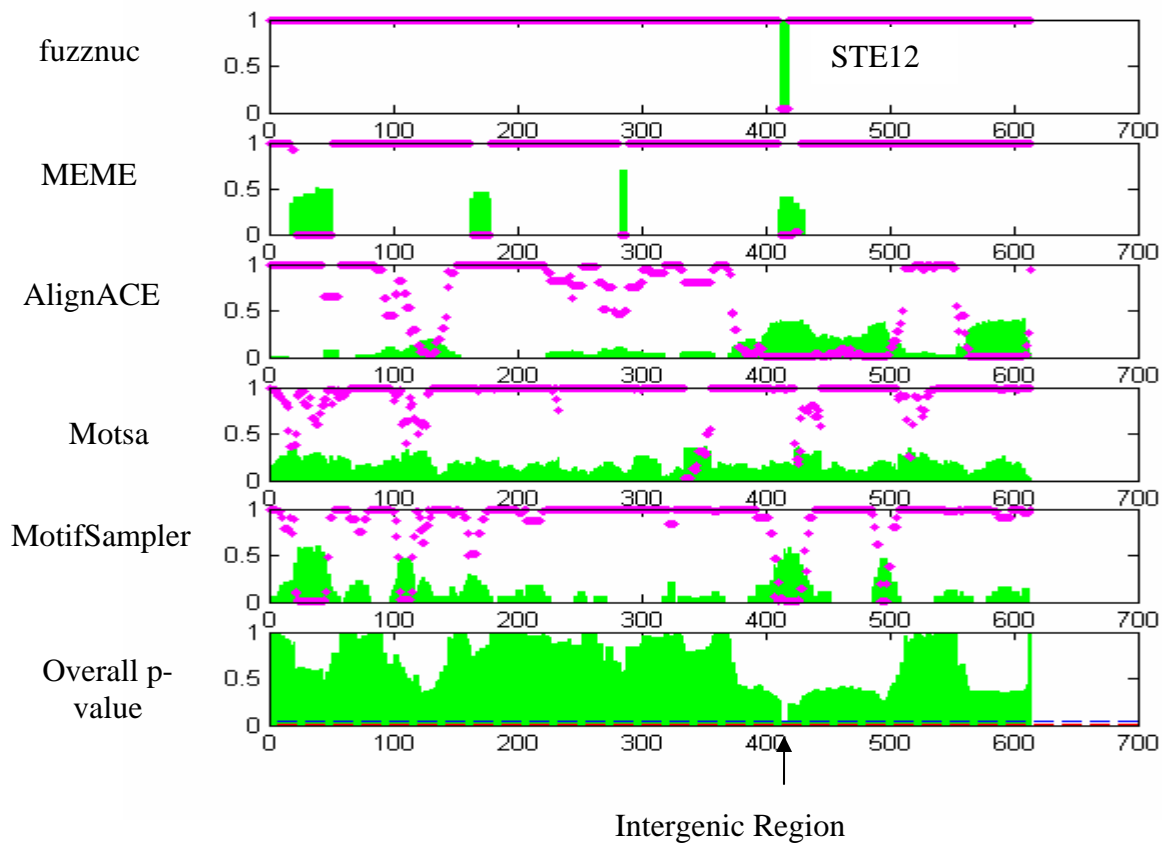

Supplement: pnas_0508649102_4.pdf [file pnas_0508649102_4.pdf]

**A**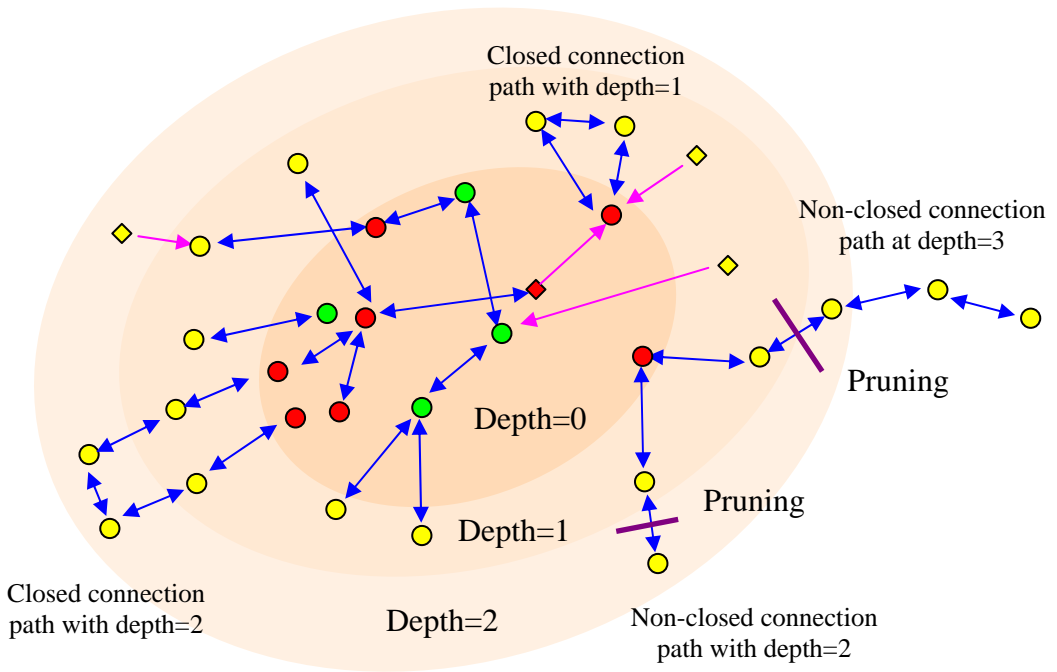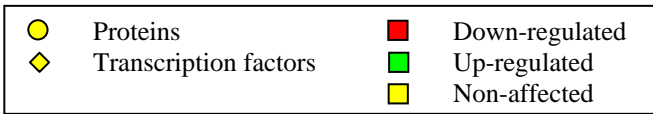**B**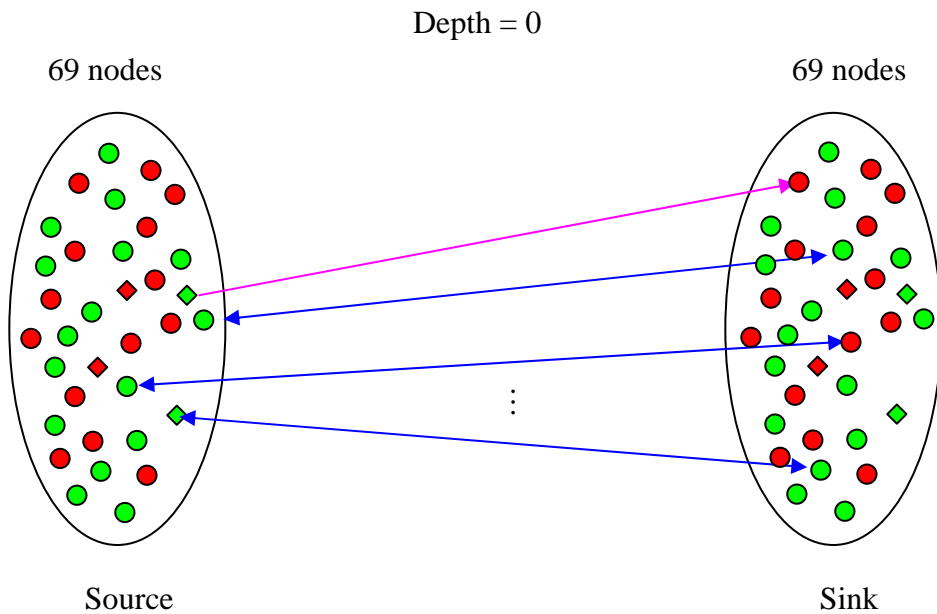

**C**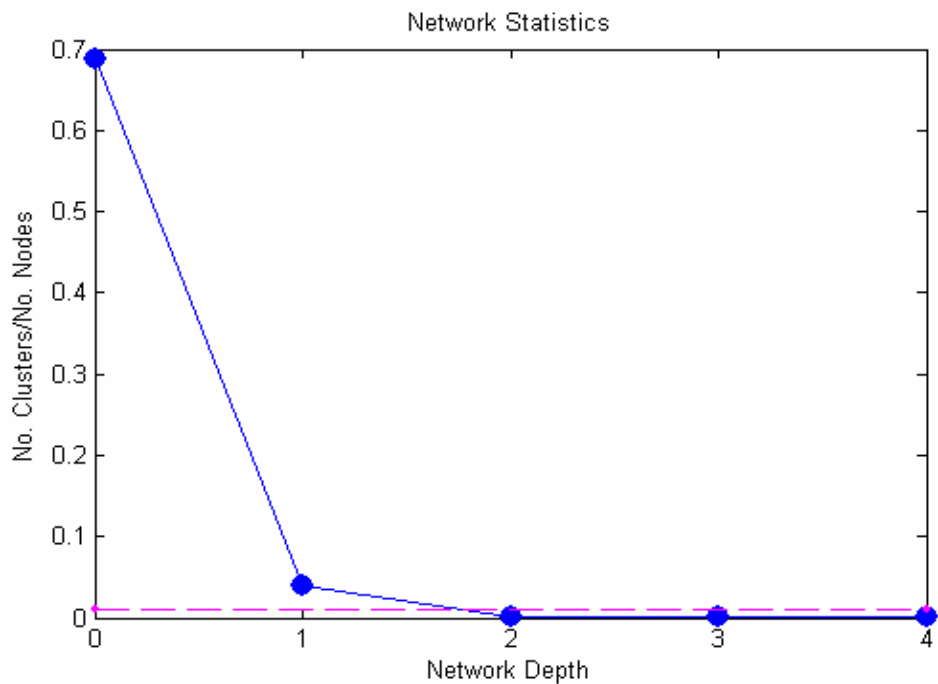

Supplement: pnas_0508649102_5.pdf [file pnas_0508649102_5.pdf]

**A**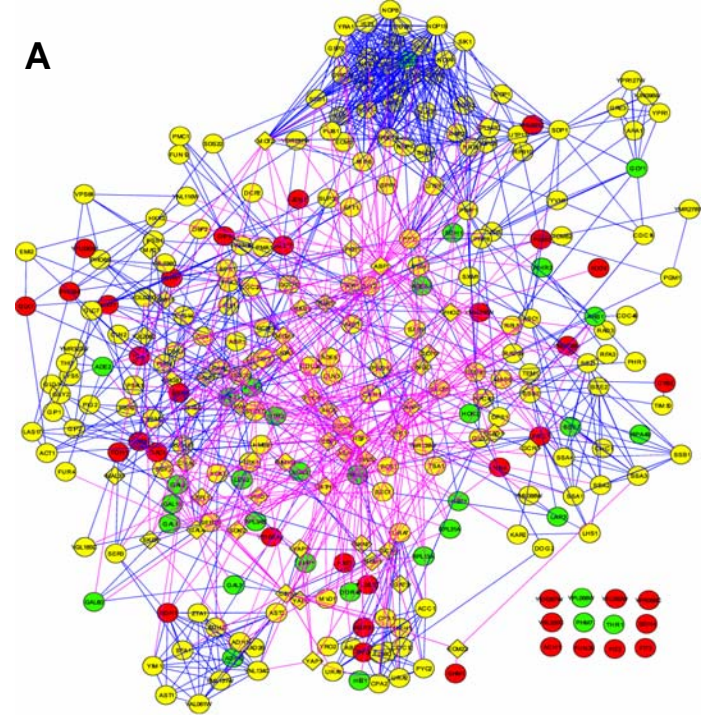**B**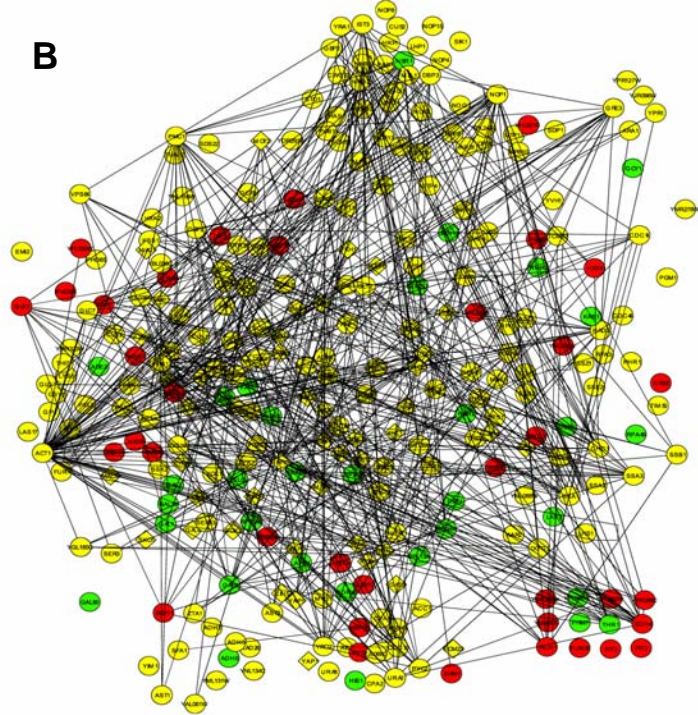**C**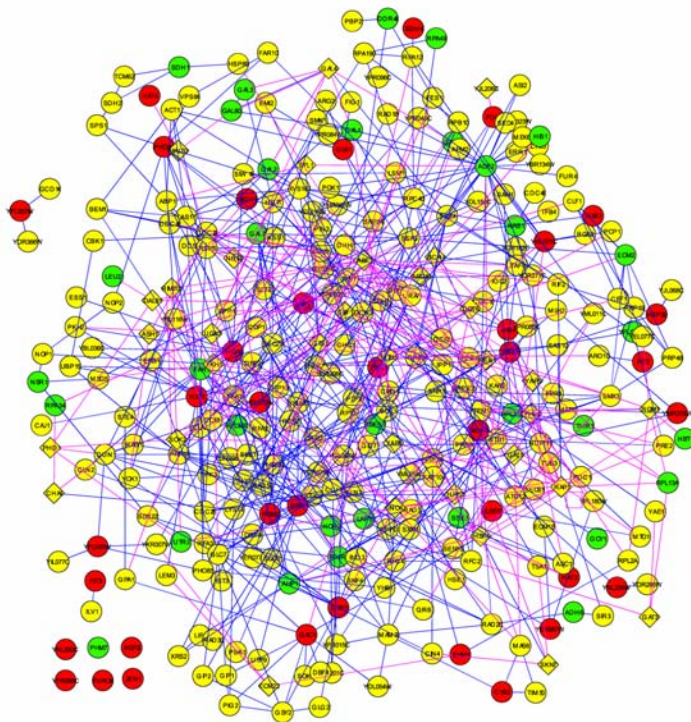

Supplement: pnas_0508649102_6.pdf [file pnas_0508649102_6.pdf]

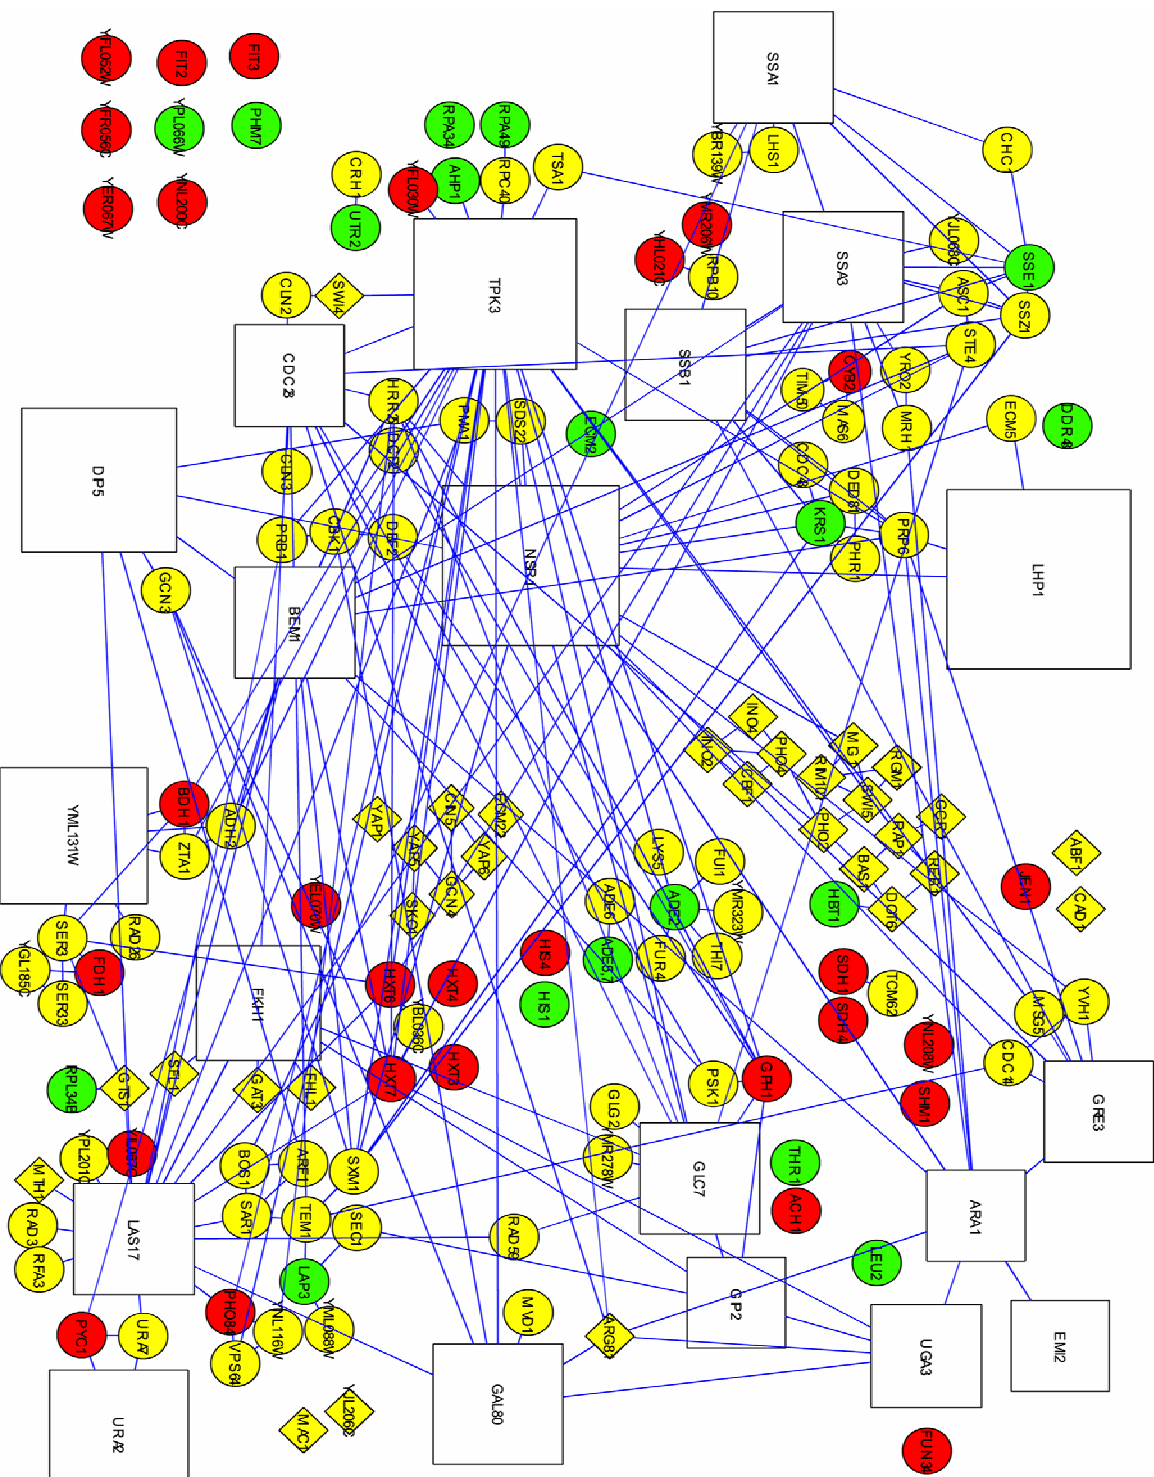

- FTT3
- FTT2
- YFL056W
- YER056W
- YFL057W
- YER057W
- YFL058W
- YER058W
- YER059W

Supplement: pnas_0508649102_7.pdf [file pnas_0508649102_7.pdf]
